# Supplementary material for: Two polymorphs of zinc(ii) coordination polymers constructed from 2-carboxyethyl(phenyl)phosphinate and 1,4-bis(1H-imidazol-1-yl)butane ligands
Source: Royal Society of Chemistry journal article supplement (doi:10.1039/c4ce01102c), 2014-09-09
Supplement: c4ce01102c1.pdf [file c4ce01102c1.pdf]

## Supporting Information

### Two Polymorphs of Zinc(II) Coordination Polymers Constructed from 2-carboxyethyl(phenyl)phosphinate and 1,4-bis(1H-imidazol-1-yl) butane ligands

Bing Li, Ming-Jie Zhou, Li Liu, Yan-Long Feng, Jian-Zhong Guo

**Fig. S1** (a) the asymmetric unit of **2**; (b) the coordination mode of  $L^{2-}$  anion and (c) the coordinated environment of Zn(II) ion in **2**. All hydrogen atoms are omitted for clarity.

Symmetry codes: A =  $-x, -1/2+y, 1/2-z$ ; B =  $-x, -y, -z$ .

**Fig. S2** The N $\cdots$ N distance and bond angles of BIB in **1**.

**Fig. S3** The N $\cdots$ N distance and bond angles of BIB in **2**.

**Fig. S4** The Zn $\cdots$ Zn distances in **1**.

**Fig. S5** The Zn $\cdots$ Zn distances in **2**.

**Fig. S6** View of the 3D framework of **2** along *c*-axis. All hydrogen atoms are omitted for clarity.

**Fig. S7** The FT-IR spectra of **1** and **2** collected as the KBr pellets in the range of 2000–400  $\text{cm}^{-1}$ .

**Fig. S8** The TGA curves of **1** and **2** on crystalline samples in  $\text{N}_2$  atmosphere in the range of 30–800  $^\circ\text{C}$ .

**Fig. S9** The XPRD patterns of two polymorphs **1** and **2**.

**Fig. S10** The crystal morphologies of two polymorphs **1** and **2**.

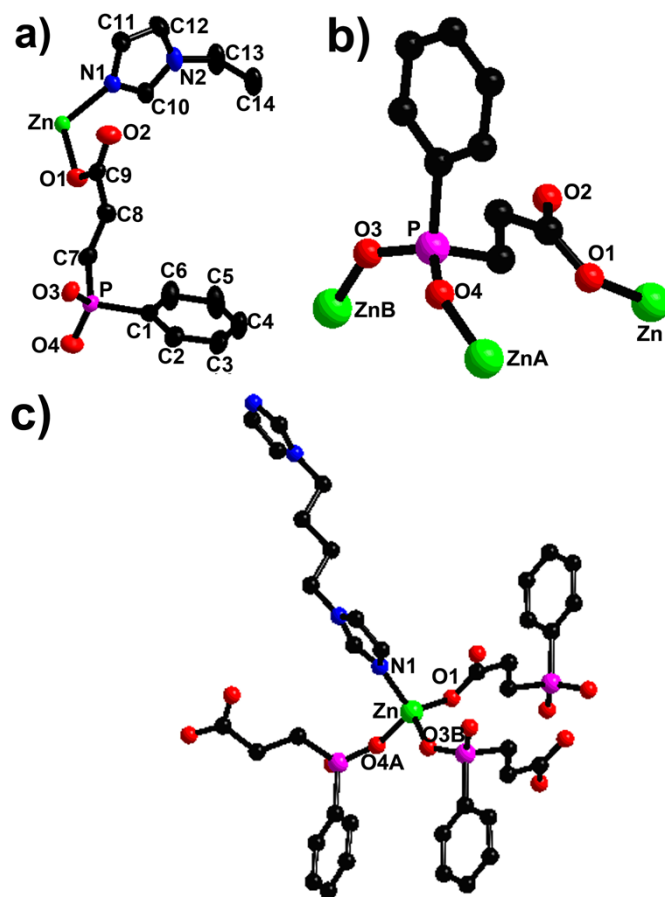

**Fig. S1** (a) the asymmetric unit of **2**; (b) the coordination mode of  $L^{2-}$  anion and (c) the coordinated environment of Zn(II) ion in **2**. All hydrogen atoms are omitted for clarity. Symmetry codes: A =  $-x, -1/2+y, 1/2-z$ ; B =  $-x, -y, -z$ .

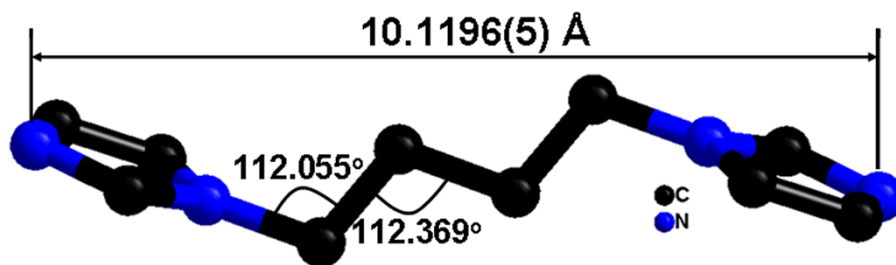

**Fig. S2** The  $N \cdots N$  distance and bond angles of BIB in **1**.

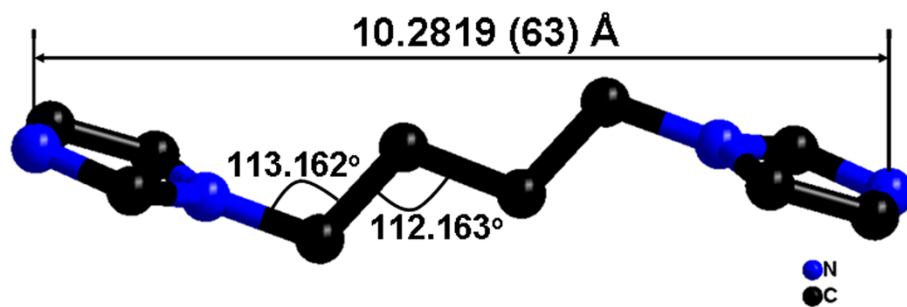

Fig. S3 The N...N distance and bond angles of BIB in 2.

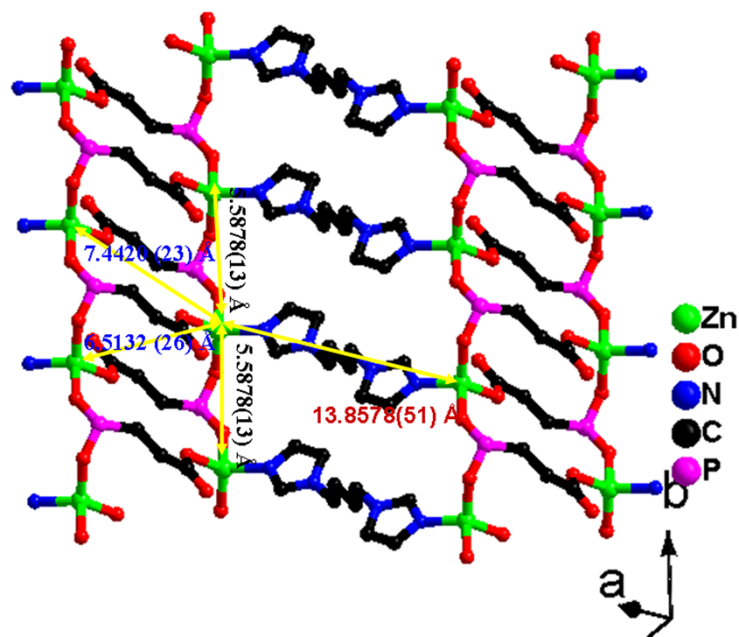

Fig. S4 The Zn...Zn distances in 1.

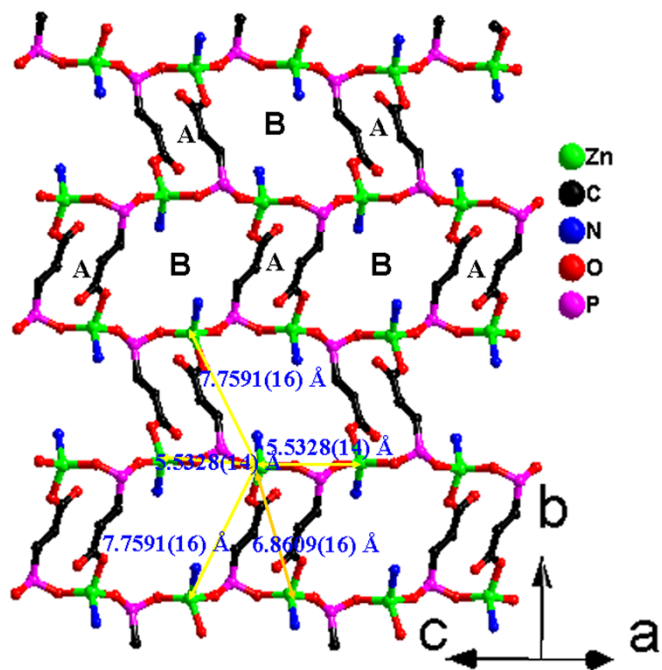

Fig. S5 The Zn···Zn distances in 2.

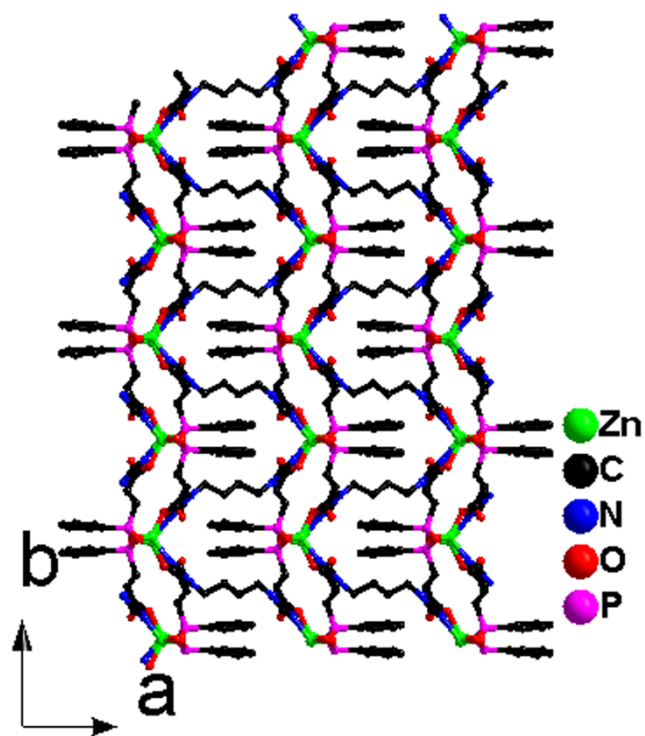

Fig. S6 View of the 3D framework of 2 along c-axis. All hydrogen atoms are omitted for clarity.

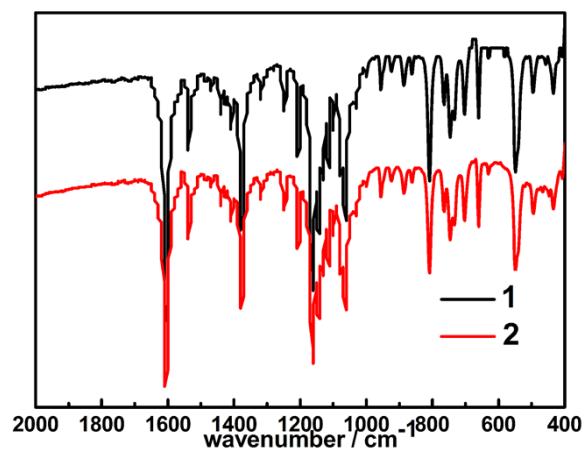

**Fig. S7** The FT-IR spectra of **1** and **2** collected as the KBr pellets in the range of 2000–400  $\text{cm}^{-1}$ .

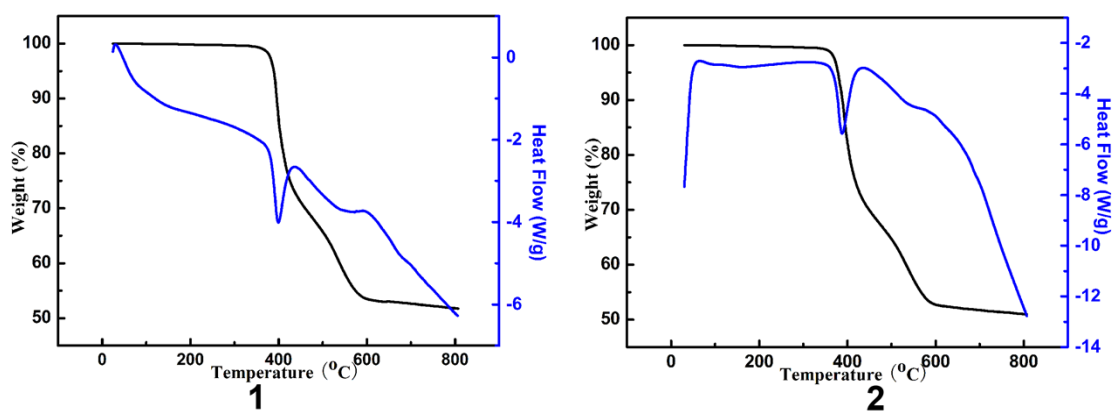

**Fig. S8** The TGA curves of **1** and **2** on crystalline samples in  $\text{N}_2$  atmosphere in the range of 30–800  $^\circ\text{C}$ .

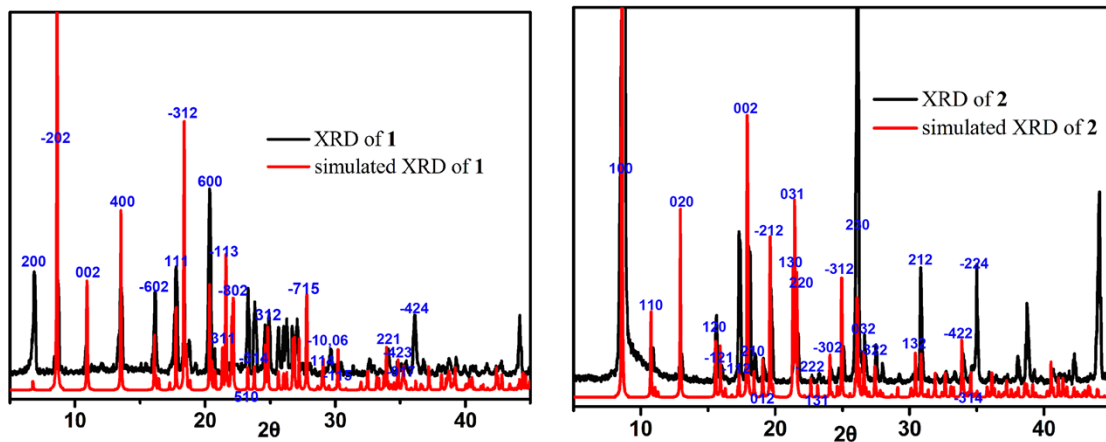

Fig. S9 The XRPD patterns of two polymorphs 1 and 2.

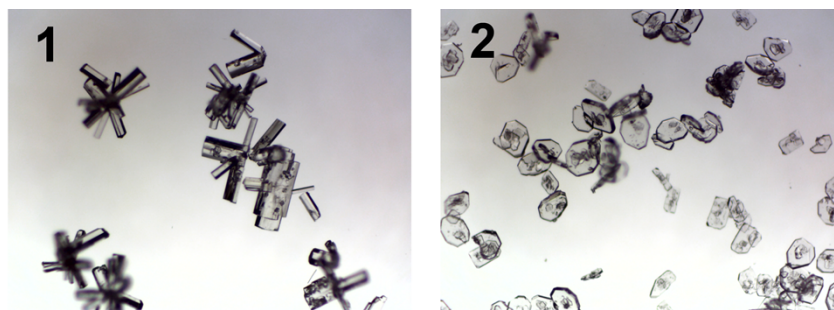

Fig. S10 The crystal morphologies of two polymorphs 1 and 2.
